# Supplementary material for: Adsorptive molecular sieving of aromatic hydrocarbons over cyclic aliphatic hydrocarbons via an intrinsic/extrinsic approach
Source: Royal Society of Chemistry journal article supplement (doi:10.1039/d3ta06602a), 2024-01-01
Supplement: d3ta06602a1.pdf [file d3ta06602a1.pdf]

# Supporting Information

## Adsorptive molecular sieving of aromatic over cyclic aliphatic hydrocarbons via the intrinsic/extrinsic approach

Gengwu Zhang,<sup>a,‡</sup> Xuanfu Zhu,<sup>a,‡</sup> Lukman O. Alimi,<sup>a</sup> Xin Liu,<sup>a</sup> Aiping Chen,<sup>b</sup>

Basem M. Moosa<sup>a</sup> and Niveen M. Khashab<sup>a,\*</sup>

<sup>a</sup>Smart Hybrid Materials Laboratory (SHMs), Advanced Membranes and Porous Materials Center (AMPMC), King Abdullah University of Science and Technology (KAUST), Thuwal, 23955-6900, Saudi Arabia

<sup>b</sup>Clean Combustion Research Center (CCRC), King Abdullah University of Science and Technology (KAUST), Thuwal 23955-6900, Saudi Arabia

<sup>‡</sup>These authors contributed equally.

\*Corresponding Author. Email: [niveen.khashab@kaust.edu.sa](mailto:niveen.khashab@kaust.edu.sa)

## 1. Materials and methods

**Materials.** All reagents were commercially available and used as supplied without further purification.

**Synthesis of TI and TA.** **TI**<sup>S1</sup> and **TA**<sup>S2</sup> were synthesized according to previous literature reports, giving **TI** in 80.0% yield and **TA** in 96.5% yield. The obtained **TI** and **TA** were recrystallized from ethyl acetate solution and dried under vacuum for one day.

**Materials Activation.** The activated **TI** or **TA** crystals were prepared under vacuum at 90 °C for 12 h to remove the residual solvent molecules. The activated **TI** or **TA** after adsorption can be regenerated by heating at 90 °C for 12 h under vacuum.

**Single-Crystal Growth.** Single crystals of **TI** with toluene (**Tol**): 10 mg of activated **TI** was dissolved in 1.5 ml of **Tol**, the crystal can be obtained by slow evaporation at room temperature for 72 h.

Single crystals of **TA** with **Tol**: 10 mg of activated **TA** was dissolved in 1.5 ml of **Tol**, the crystal can be obtained by slow evaporation at room temperature for 72 h.

Crystallization of **TI** with methylcyclohexane (**MCH**): 10 mg of activated **TI** was dissolved in 1.5 ml of different organic solvents. The solution was added to 0.1 ml of **MCH** for slow evaporation or diffusion with **MCH** at room temperature. White powder was obtained after several days (Table S2).

Crystallization of **TA** with **MCH**: 10 mg of activated **TA** was dissolved in 1.5 ml of different organic solvents. The solution was added to 0.1 ml of **MCH** for slow evaporation or diffusion with **MCH** at room temperature. White powder was obtained after several days (Table S2).

**Solid-Vapor Sorption Experiments.** Single component sorption: An open 5

ml vial containing 30 mg of **TI** or **TA** was placed in a sealed 20 ml vial containing 1.5 ml of guest solvent at room temperature.

Mix component sorption: An open 5 ml vial containing 30 mg of **TI** or **TA** was placed in a sealed 20 ml vial containing an equimolar mixture of **ToI/MCH**.

For both single and mixed component sorption experiment, the uptake capacity of **TI** or **TA** was measured at different time intervals by completely dissolving the samples in CDCl<sub>3</sub> for <sup>1</sup>H NMR, and the value was determined from the ratio of guest and host peaks.

**NMR experiment.** NMR spectra were recorded on Bruker-500 (500MHz for <sup>1</sup>H; 126 MHz for <sup>13</sup>C) instruments.

**Thermogravimetric analysis.** Thermogravimetric analysis (TGA) was carried out using a TGA Discovery 5500 with an automated vertical overhead thermobalance. The samples were heated at 10 °C/min from 25 °C to 800 °C using N<sub>2</sub> as the protective gas.

**Powder X-ray diffraction.** Powder X-ray diffraction (PXRD) data were collected using a Bruker D8 Advance X-ray diffractometer (40 kV, 40 mA) with the Cu K $\alpha$  radiation ( $\lambda = 1.54178 \text{ \AA}$ ). 2 $\theta$  scans were performed in the range of 3.0–50° with a increment of 0.0197144° at a scan speed of 4.9286 (°/min). The sample was placed in a zero-background sample holder.

**Nitrogen Adsorption Experiment.** Low-pressure gas adsorption measurement was performed on a Micromeritics Accelerated Surface Area and Porosimetry System (ASAP) 2020 surface area analyzer. Samples were degassed under dynamic vacuum for 12 h at 90 °C prior to each measurement. N<sub>2</sub> isotherms were measured using a liquid nitrogen bath (77 K).

**Single crystal X-ray diffraction.** Single crystal X-ray diffraction data were collected by a Bruker D8 Venture equipped with a digital camera diffractometer using graphite-monochromated Mo K $\alpha$  radiation ( $\lambda = 0.71073 \text{ \AA}$ ) or Cu K $\alpha$  ( $\lambda =$

1.54178 Å). Data reductions were carried out by a standard procedure using the Bruker software package SaintPlus 6.01.<sup>S3</sup> The absorption and other systematic errors corrections were performed by SADABS.<sup>S4</sup> The structures were solved by direct methods using SHELXS-2008 and refined using SHELXL-2018.<sup>S5</sup> X-Seed<sup>S6</sup> was used as the graphical interface for the SHELX program suite. Data collection, structure refinement parameters and crystallographic data for the crystals are given in Table S1.

**Gas chromatography (GC) analysis.** GC measurements were carried out using an Agilent 7890A instrument configured with an FID detector and a HPINNOWAX column (60 m × 0.320 mm × 0.5 μm). The following GC method was used: the oven was programmed in 40 °C with 35 min hold; injection temperature was 180 °C; detector temperature was 250 °C with hydrogen, air, and make-up flow-rates of 40, 400, and 15 mL min<sup>-1</sup>, respectively; helium (carrier gas) flowrate was 3.0 mL min<sup>-1</sup>.

**Solvent-accessible voids calculation.** Solvent-accessible voids can be visualized by calculating Connolly surfaces using MS-ROLL,<sup>S7,S8</sup> another program incorporated into X-Seed.

**Pore size distribution calculation.** Molecular modelling of **TA** and **TI** were constructed by referring to their single crystal structures of Tol@TI and Tol@TA by removing the guest/solvent molecules. Zeo++ is used to analyze the pore size distribution.<sup>S9</sup>

## 2. Crystallography data

**Table S1.** Crystallographic details for **TI** and **TA** macrocycle with **Tol**.

| IDENTIFICATION CODE           | <b>TA@Tol</b>                                         | <b>TI@Tol</b>                                  |
|-------------------------------|-------------------------------------------------------|------------------------------------------------|
| <b>Empirical formula</b>      | C <sub>52</sub> H <sub>71</sub> N <sub>6</sub>        | C <sub>49</sub> H <sub>56</sub> N <sub>6</sub> |
| <b>Formula weight (g/mol)</b> | 777.94                                                | 728.99                                         |
| <b>Temperature /K</b>         | 120.0                                                 | 120.0                                          |
| <b>Crystal system</b>         | Orthorhombic                                          | Monoclinic                                     |
| <b>Space group</b>            | <i>P</i> 2 <sub>1</sub> 2 <sub>1</sub> 2 <sub>1</sub> | <i>P</i> 2 <sub>1</sub>                        |

|                                                         |                                     |                                     |
|---------------------------------------------------------|-------------------------------------|-------------------------------------|
| <b>a/ Å</b>                                             | 8.5912(4)                           | 11.3748(6)                          |
| <b>b/ Å</b>                                             | 34.7476(15)                         | 10.4601(4)                          |
| <b>c/ Å</b>                                             | 45.4824(19)                         | 18.2806(9)                          |
| <b><math>\alpha</math>/°</b>                            | 90                                  | 90                                  |
| <b><math>\beta</math>/°</b>                             | 90                                  | 100.519(2)                          |
| <b><math>\gamma</math>/°</b>                            | 90                                  | 90                                  |
| <b>Volume/ Å<sup>3</sup></b>                            | 13577.6(10)                         | 2138.50(18)                         |
| <b>Z</b>                                                | 12                                  | 2                                   |
| <b><math>\rho</math>cal/cm<sup>3</sup></b>              | 1.142                               | 1.132                               |
| <b>F(000)</b>                                           | 5008                                | 784                                 |
| <b>Radiation</b>                                        | CuK $\alpha$ ( $\lambda$ = 1.54178) | MoK $\alpha$ ( $\lambda$ = 0.71073) |
| <b>reflections collected</b>                            | 160479                              | 12714                               |
| <b>Independent reflections</b>                          | 23155( $R_{int}$ = 0.0360)          | 7311( $R_{int}$ = 0.0243)           |
| <b>Data/restraints/parameters</b>                       | 21285/0/1489                        | 6571/1/497                          |
| <b>Goodness-of-fit on F<sup>2</sup></b>                 | 1.056                               | 1.043                               |
| <b>Final R indexes [<math>I \geq 2\sigma(I)</math>]</b> | $R1 = 0.0646, wR2 = 0.1708$         | $R1 = 0.0396, wR2 = 0.0863$         |
| <b>CCDC numbers</b>                                     | 2287896                             | 2287895                             |

**Table S2.** Crystallization solvents and methods for **TI** and **TA** macrocycle with **MCH**.

| <b>Compounds</b> | <b>Solvents</b>                       | <b>Methods</b> | <b>Results</b> |
|------------------|---------------------------------------|----------------|----------------|
| <b>TI (10mg)</b> | 1.5 ml DCM + 0.1ml MCH                | evaporation    | powder         |
|                  | 1.5 ml CHCl <sub>3</sub> + 0.1ml MCH  |                | powder         |
|                  | 1.5 ml Acetone + 0.1ml MCH            |                | powder         |
|                  | 1.5 ml Ethyl acetate + 0.1ml MCH      |                | powder         |
|                  | 3 ml CH <sub>3</sub> CN + 0.1ml MCH   |                | powder         |
|                  | 1.5 ml DCM + 1.5 ml MCH               | diffusion      | powder         |
|                  | 1.5 ml CHCl <sub>3</sub> + 1.5 ml MCH |                | powder         |
|                  | 1.5 ml Acetone + 1.5 ml MCH           |                | powder         |
|                  | 1.5 ml Ethyl acetate + 1.5 ml MCH     |                | powder         |
|                  | 3 ml CH <sub>3</sub> CN + 1.5 ml MCH  |                | powder         |
| <b>TA (10mg)</b> | 1.5 ml DCM + 0.1ml MCH                | evaporation    | powder         |
|                  | 1.5 ml CHCl <sub>3</sub> + 0.1ml MCH  |                | powder         |
|                  | 1.5 ml Acetone + 0.1ml MCH            |                | powder         |
|                  | 1.5 ml Ethyl acetate + 0.1ml MCH      |                | powder         |
|                  | 1.5 ml MeOH + 0.1ml MCH               |                | powder         |

|  |                                       |           |        |
|--|---------------------------------------|-----------|--------|
|  | 1.5 ml DCM + 1.5 ml MCH               | diffusion | powder |
|  | 1.5 ml CHCl <sub>3</sub> + 1.5 ml MCH |           | powder |
|  | 1.5 ml Acetone + 1.5 ml MCH           |           | powder |
|  | 1.5 ml Ethyl acetate + 1.5 ml MCH     |           | powder |
|  | 1.5 ml MeOH + 1.5 ml MCH              |           | powder |

### 3. Supplementary figures

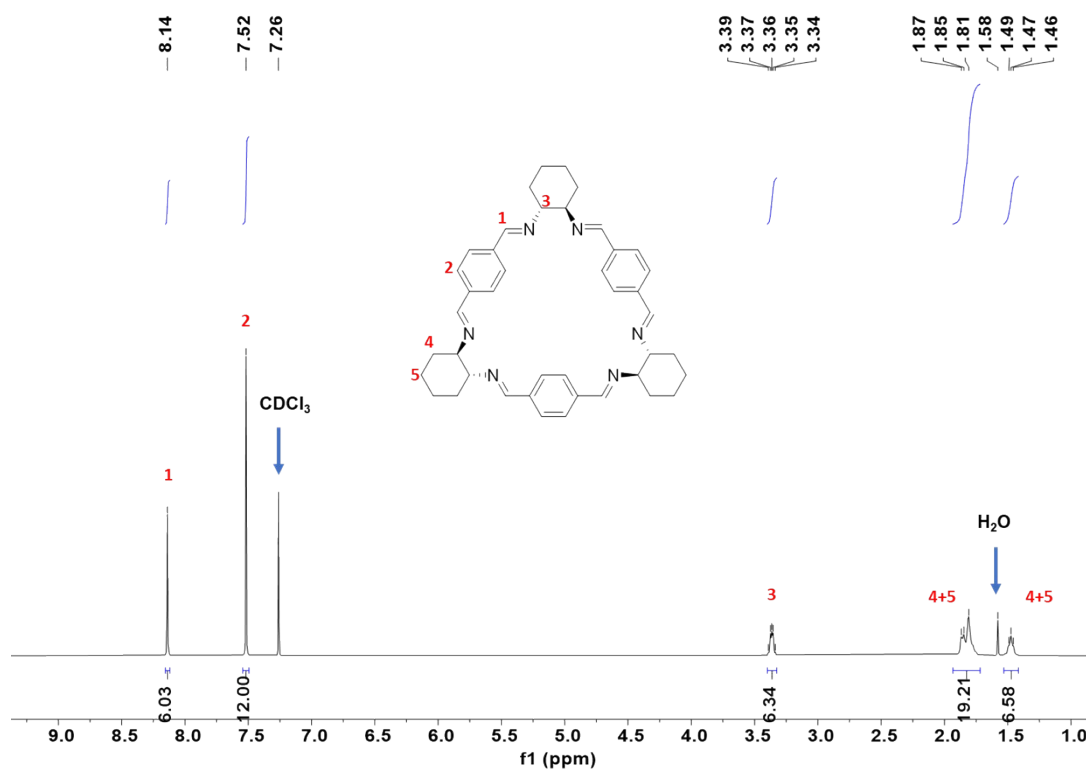

**Figure S1.** <sup>1</sup>H NMR spectrum (500 MHz, chloroform-*d*, 298K) of TI.

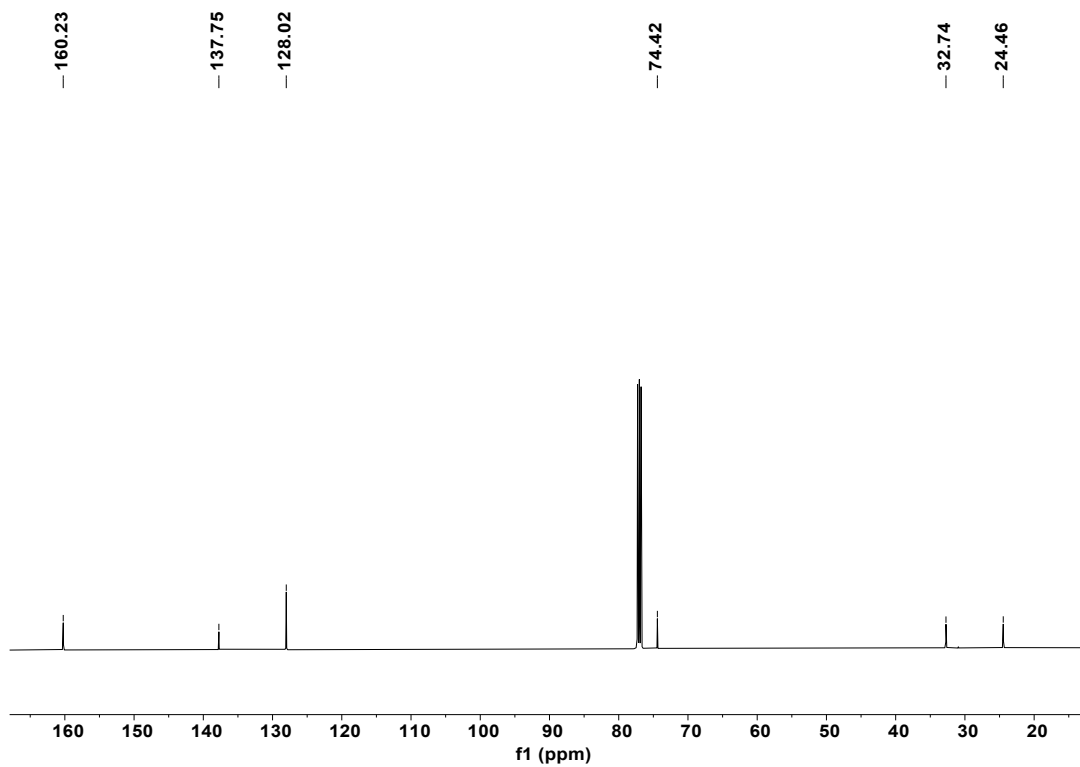

**Figure S2.**  $^{13}\text{C}$  NMR spectrum (126 MHz, chloroform-*d*, 298K) of **TI**.

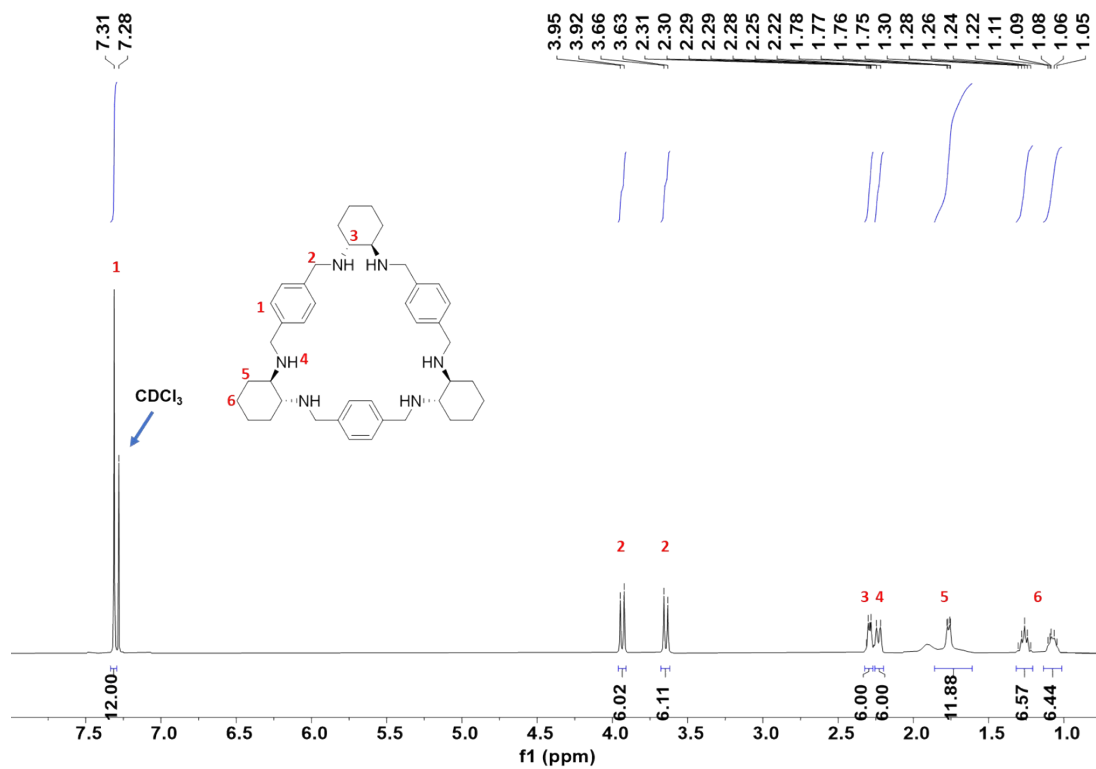

**Figure S3.**  $^1\text{H}$  NMR spectrum (500 MHz, chloroform-*d*, 298K) of **TA**.

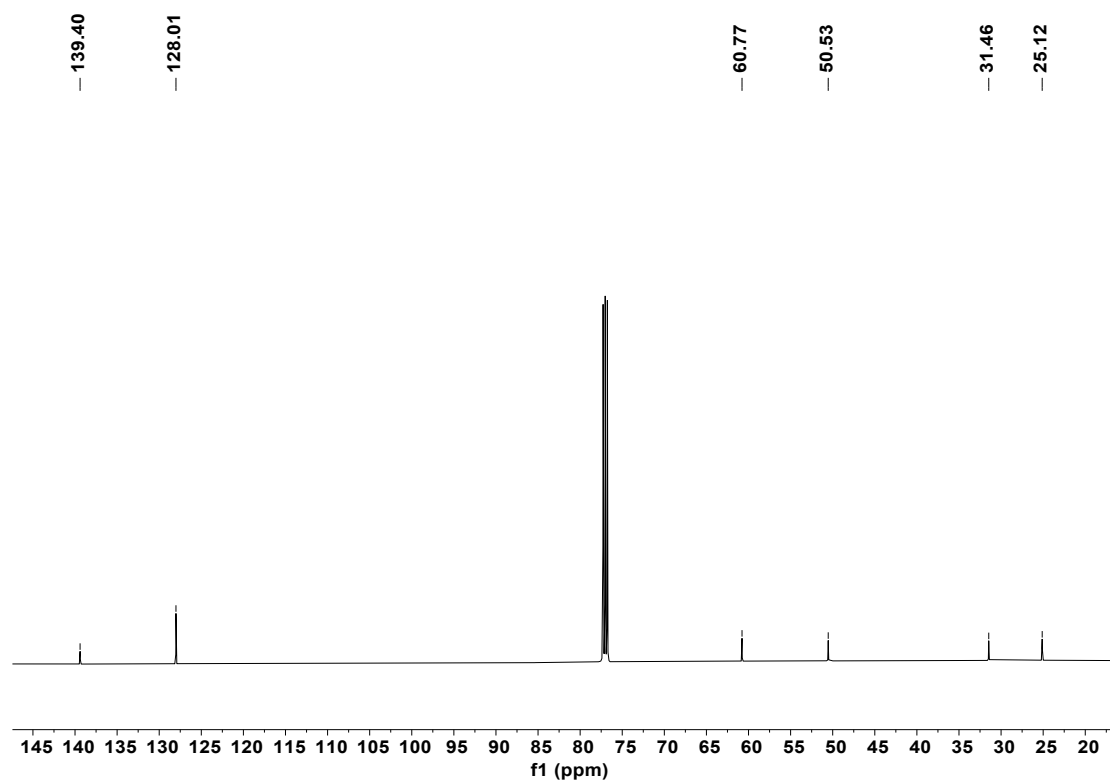

**Figure S4.**  $^{13}\text{C}$  NMR spectrum (126 MHz, chloroform- $d$ , 298K) of TA.

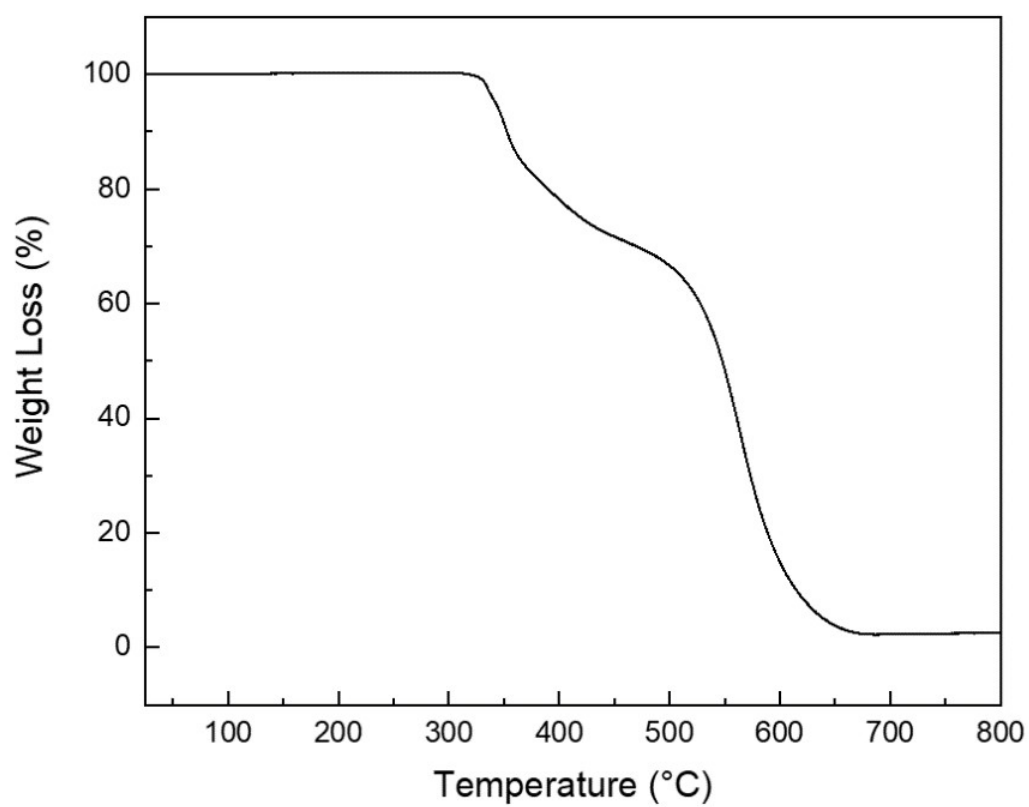

**Figure S5.** TGA curve of pure activated TI.



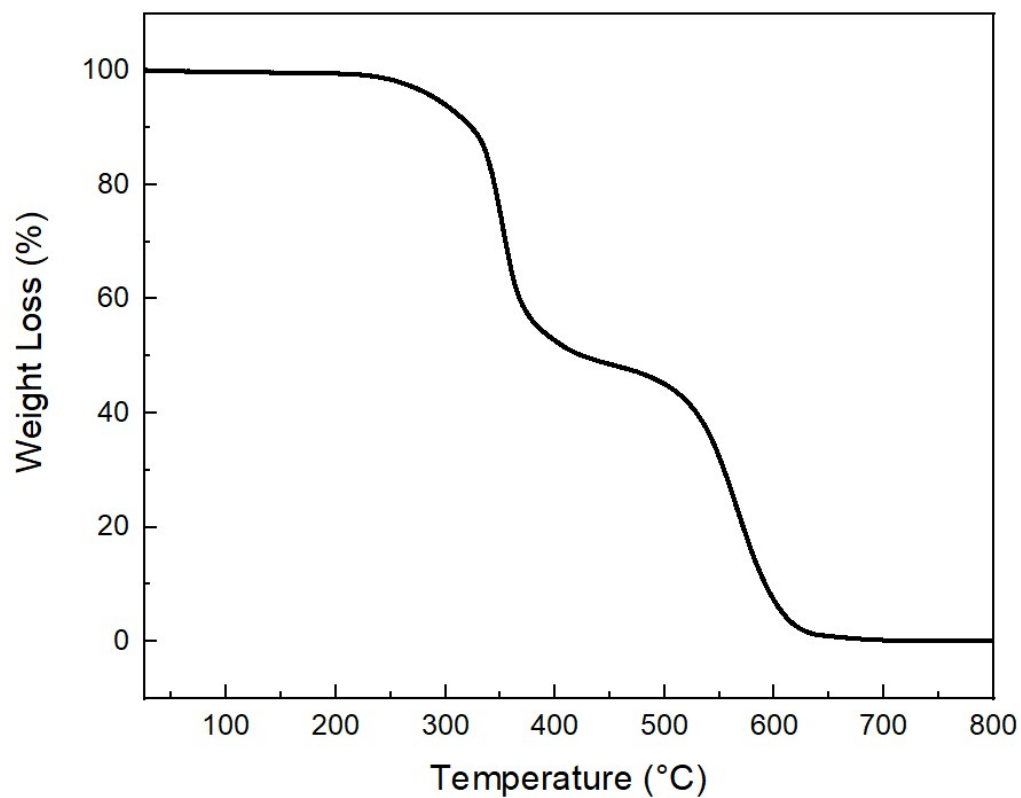

**Figure S6.** TGA curve of pure activated TA.

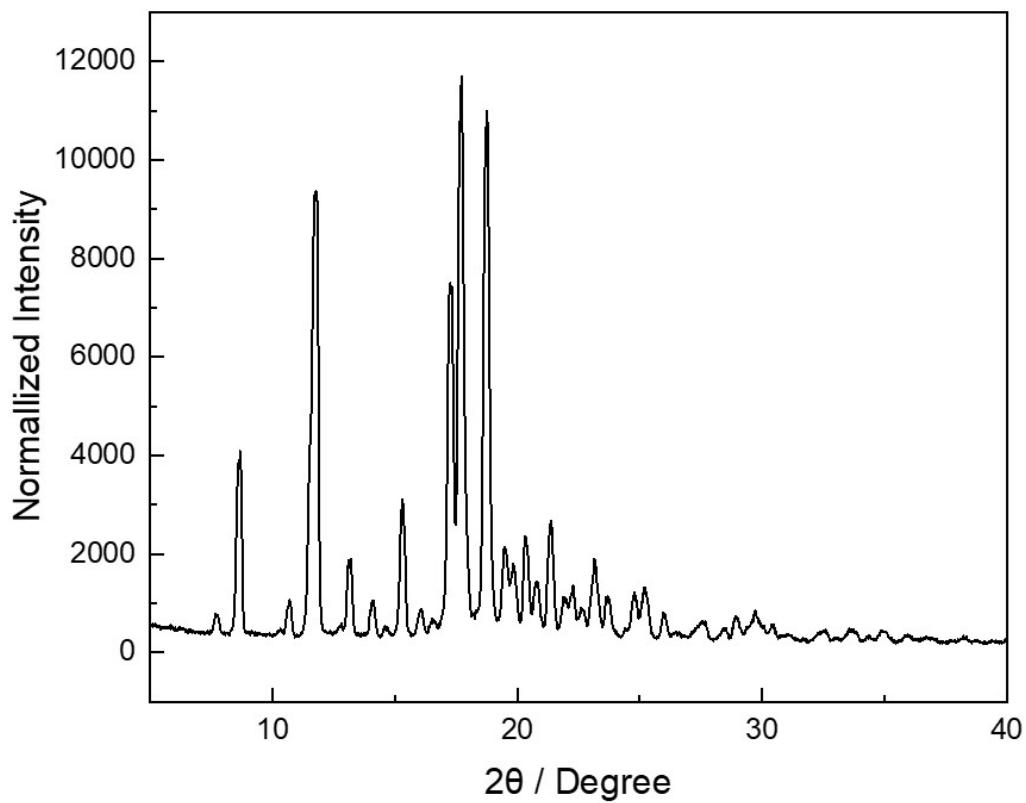

**Figure S7.** PXRD pattern of pure activated TI.

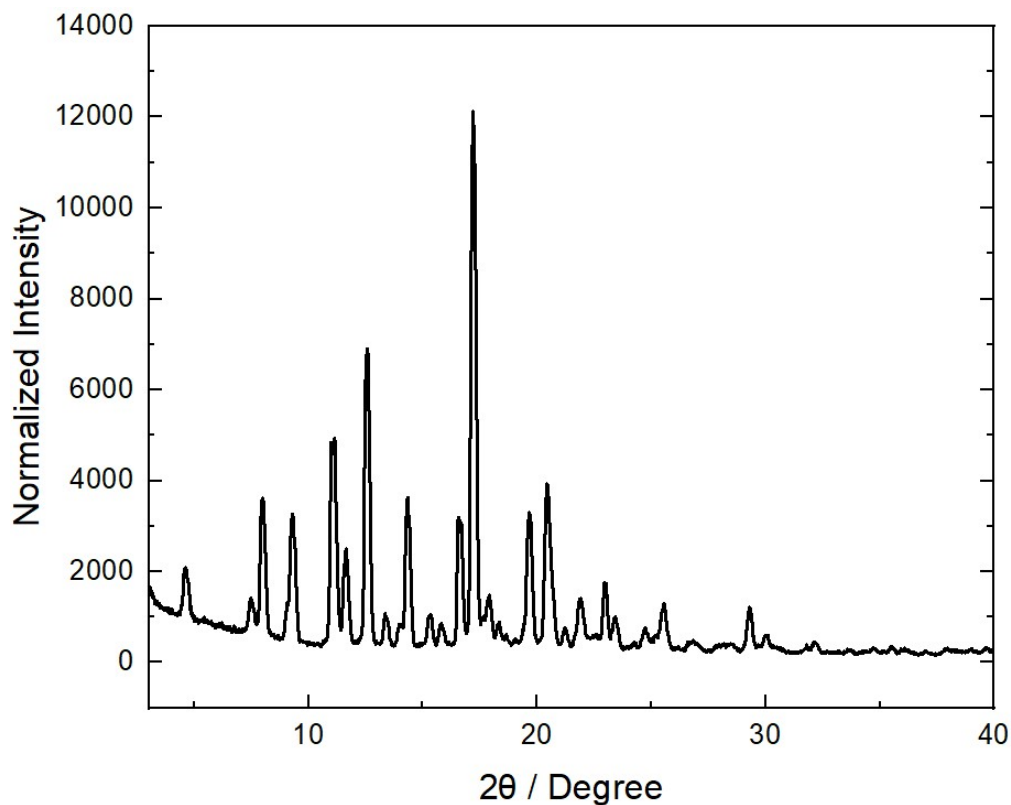

Figure S8. PXRD pattern of pure activated TA.

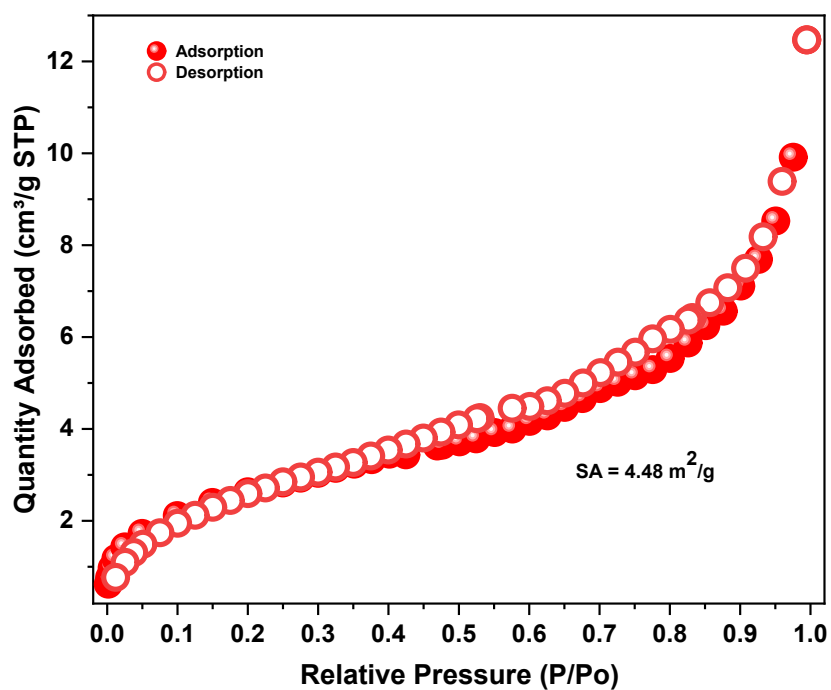

Figure S9. Nitrogen adsorption isotherm at 77 K for activated TI.

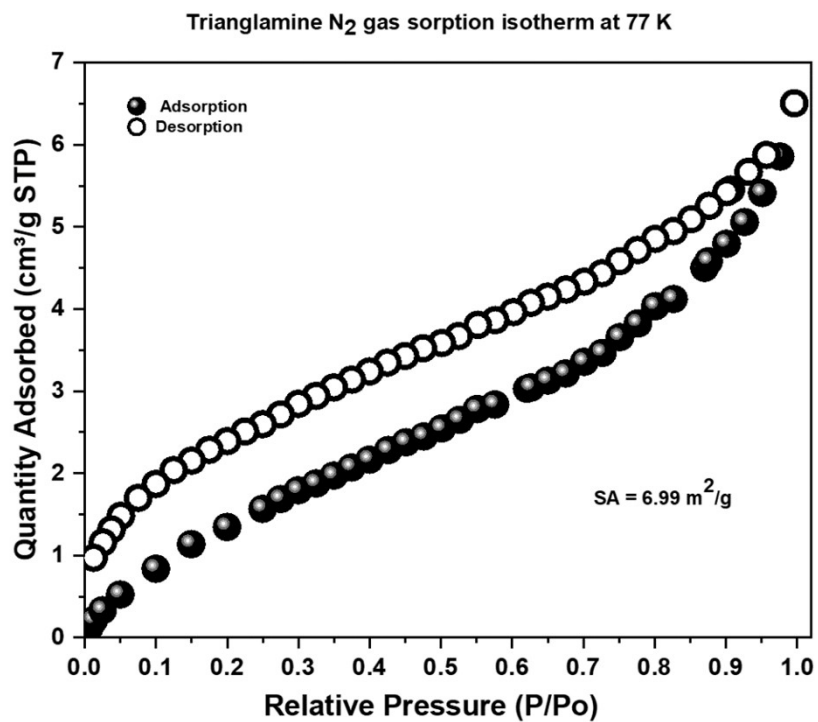

**Figure S10.** Nitrogen adsorption isotherm at 77 K for activated TA.

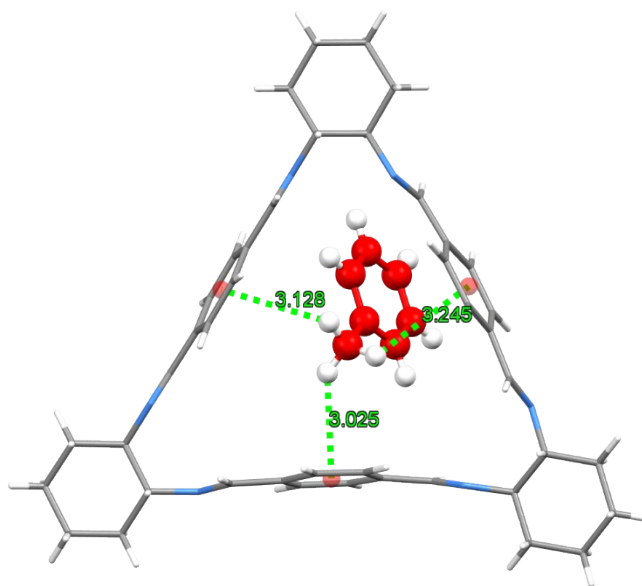

**Figure S11.** Asymmetric unit of Tol@TI showing C-H $\cdots$  $\pi$  interactions between host TI macrocycle and guest Tol.

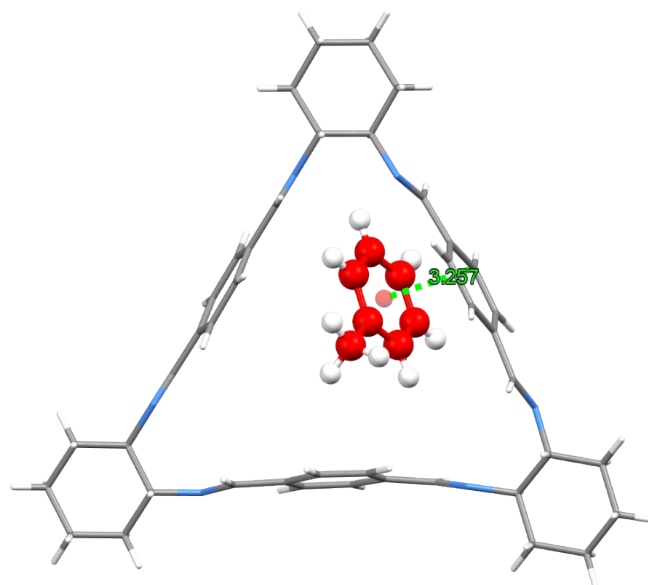

**Figure S12.** Asymmetric unit of **Tol@TI** showing  $\pi \cdots \pi$  interaction between host **TI** macrocycle and guest **Tol**.

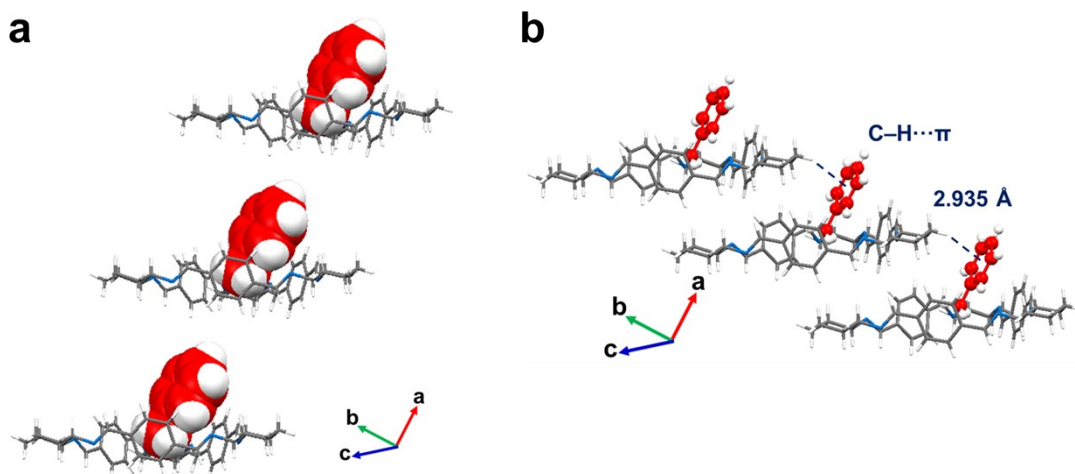

**Figure S13.** Perspective view showing inclined 1D packing arrangement of **Tol@TI** along crystallographic *a* axis and the C-H $\cdots$  $\pi$  interaction between **Tol** and adjacent **TI**.

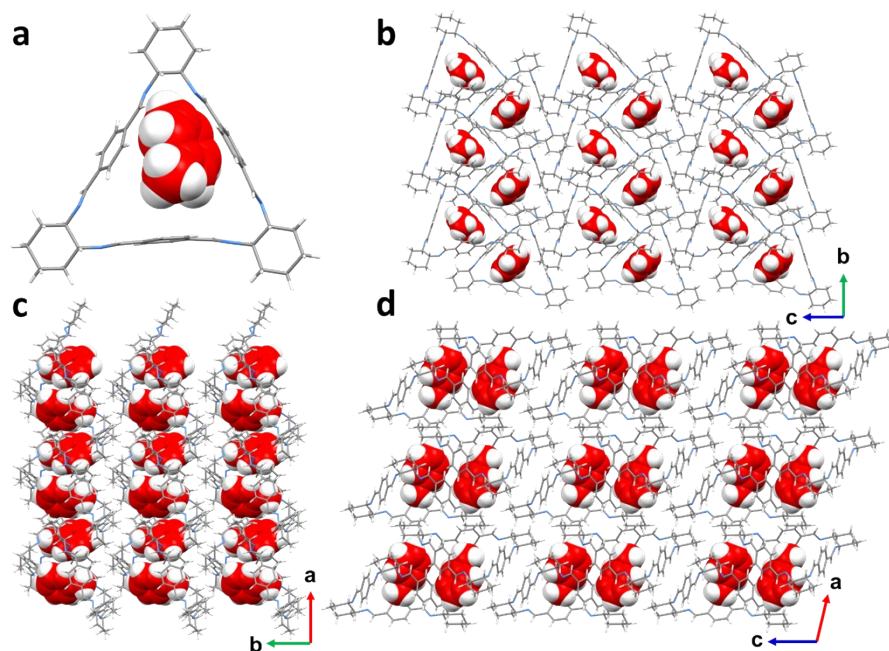

**Figure S14.** (a) Asymmetric unit of **Tol@TI**. (b-d)Packing arrangement of **Tol@TI** viewed from all crystallographic axes.

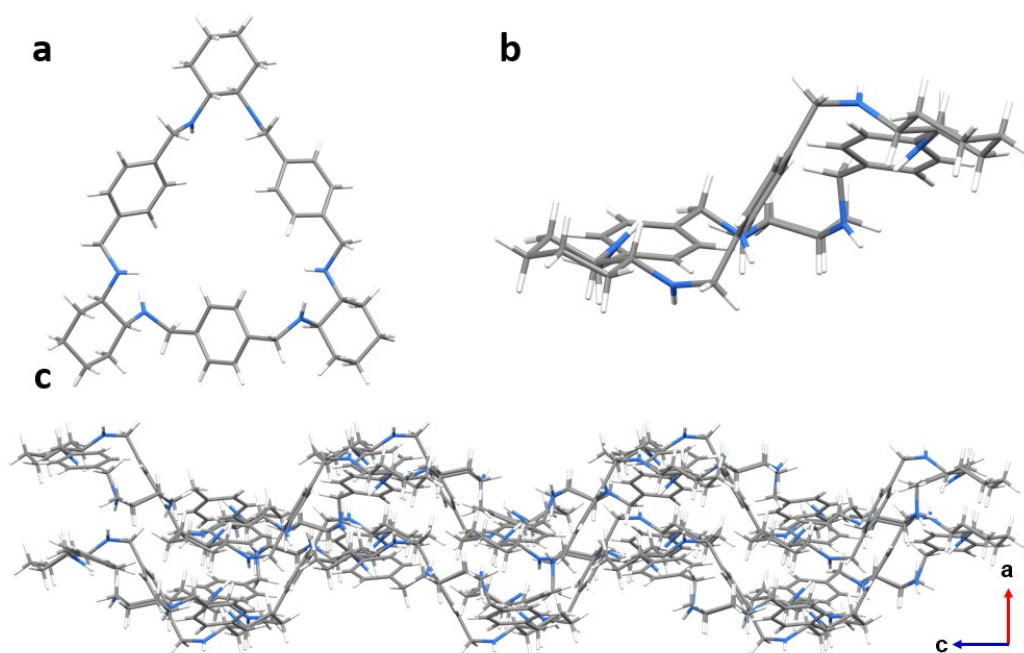

**Figure S15.** (a) Top view and (b) Side view of **TA** macrocycles in **Tol@TA**. (c) Packing arrangement of **TA** macrocycle showing zigzag structure (guest molecules were hidden for clarity).

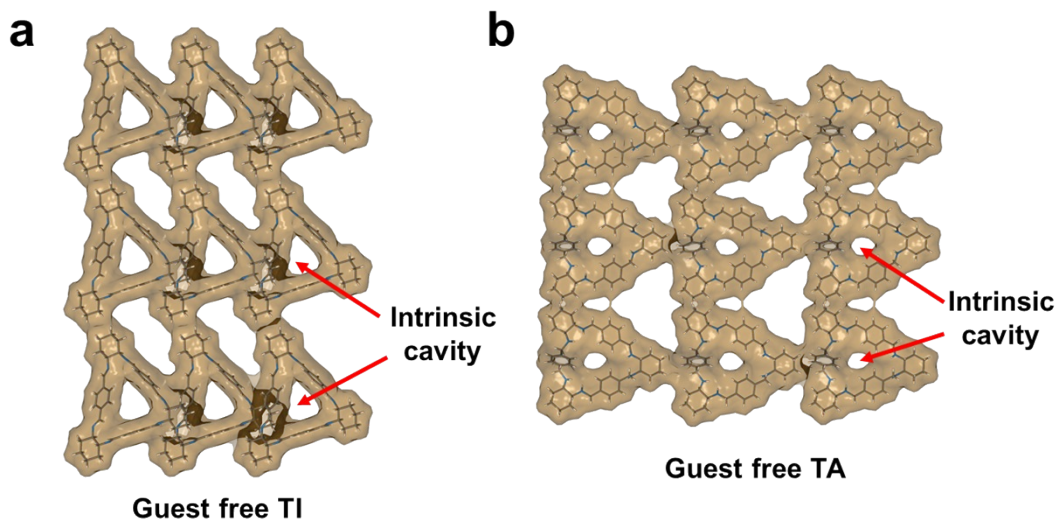

**Figure S16.** Single layer crystal packing structure along crystallographic a axis with the contact surfaces of (a) guest-free **TI** and (b) guest-free **TA** showing the guest accessible voids within their intrinsic cavities. The contact surfaces of empty **TI** and **TA** macrocycles were mapped using MSRoll program with probe radius of 1.2 Å. **TA** with distorted flexible conformation shows much smaller guest accessible voids than **TI**.

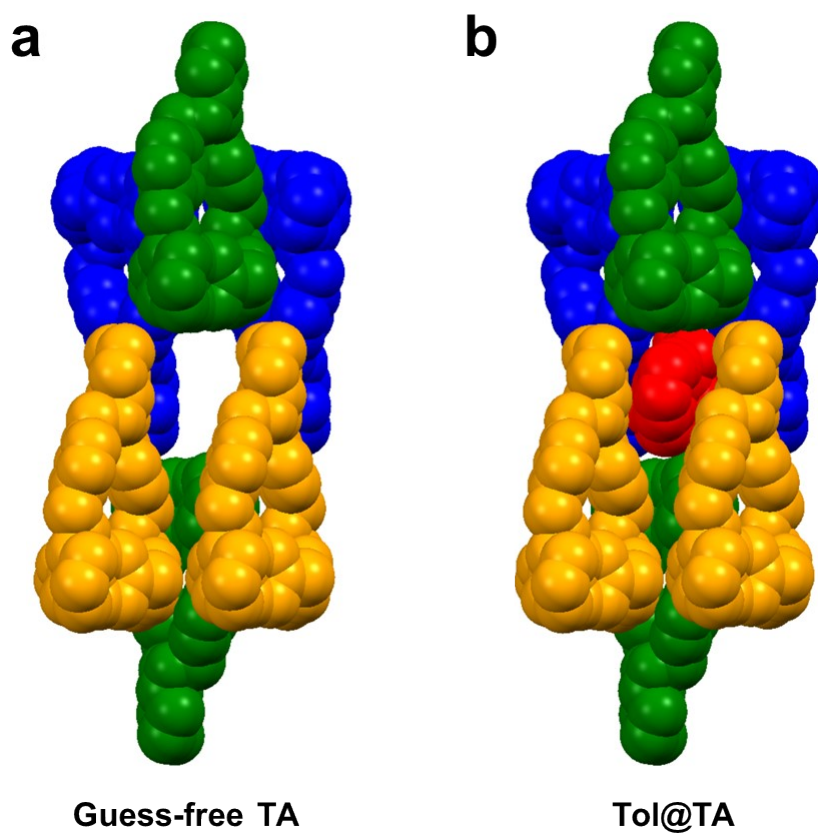

**Figure S17.** The 3D packing structure along crystallographic c axis of (a) guest-free **TA**

and (b) **Tol@TA**. The three **TI** host molecules in one asymmetric unit were colored in yellow, blue, and green, respectively. The guest **Tol** molecules were colored in red and located in the extrinsic channel.

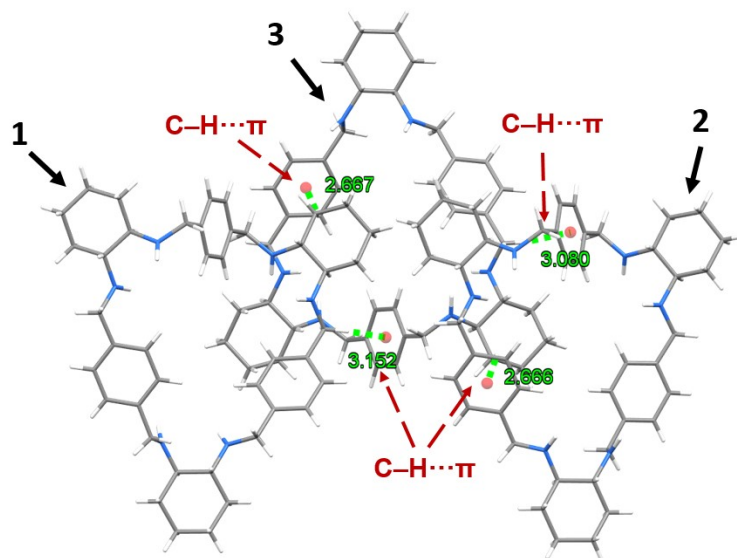

**Figure S18.** Perspective view showing some C-H... $\pi$  interactions between TA macrocycle 1, 2 and 3.

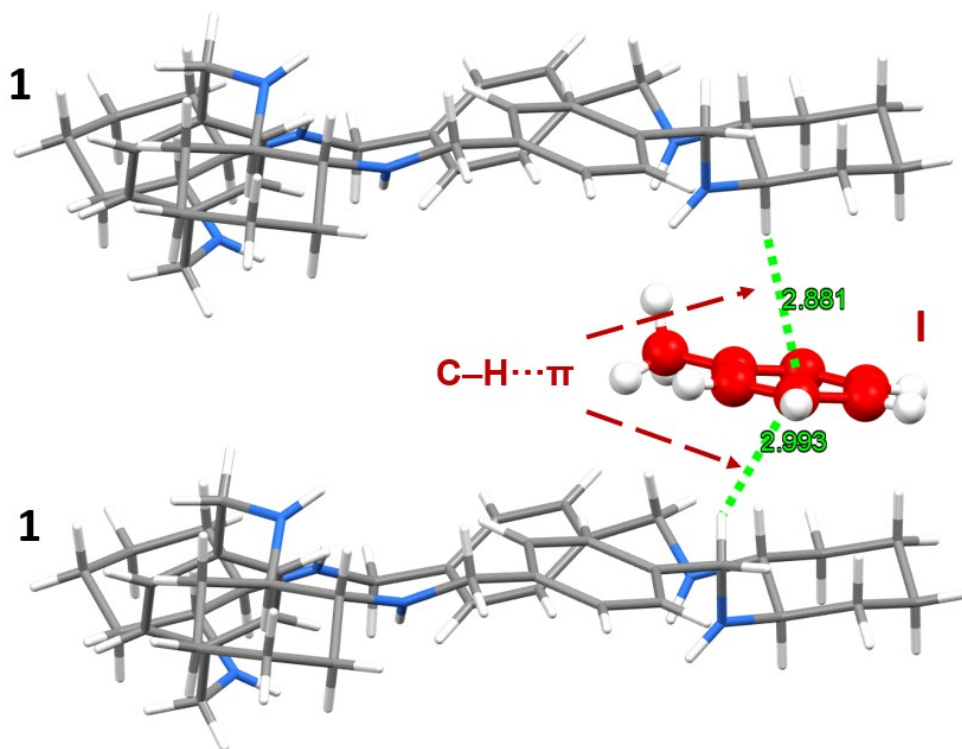

**Figure S19.** Perspective view showing some C-H... $\pi$  interactions between TA macrocycle

1 and Tol I.

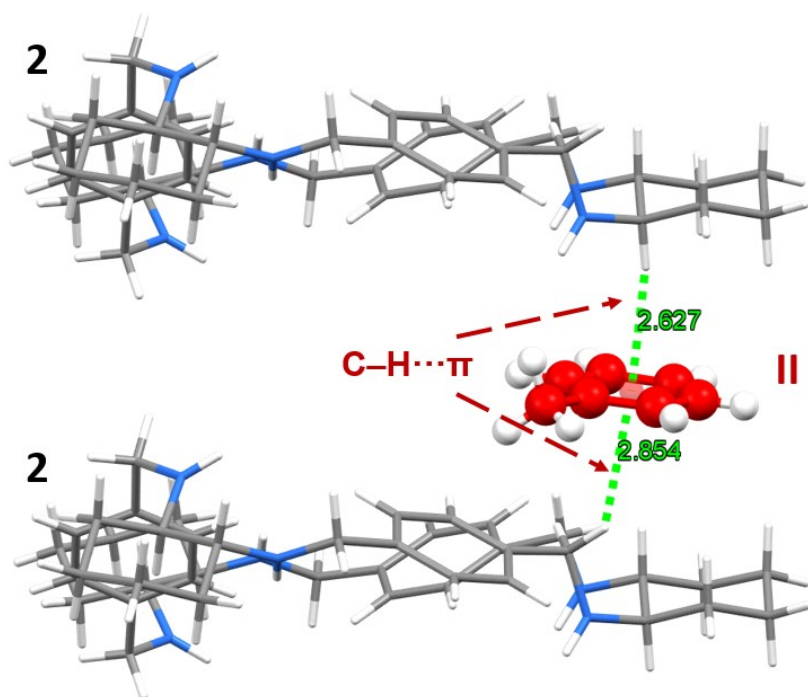

**Figure S20.** Perspective view showing some C-H... $\pi$  interactions between TA macrocycle 2 and Tol II.

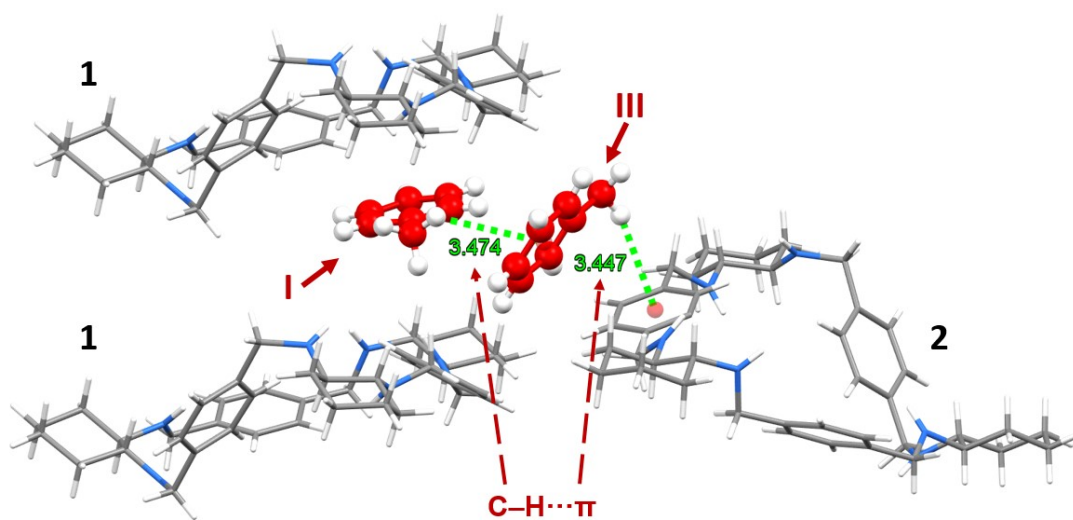

**Figure S21.** Perspective view showing some C-H... $\pi$  interactions between TA macrocycle 1 and Tol I and III.



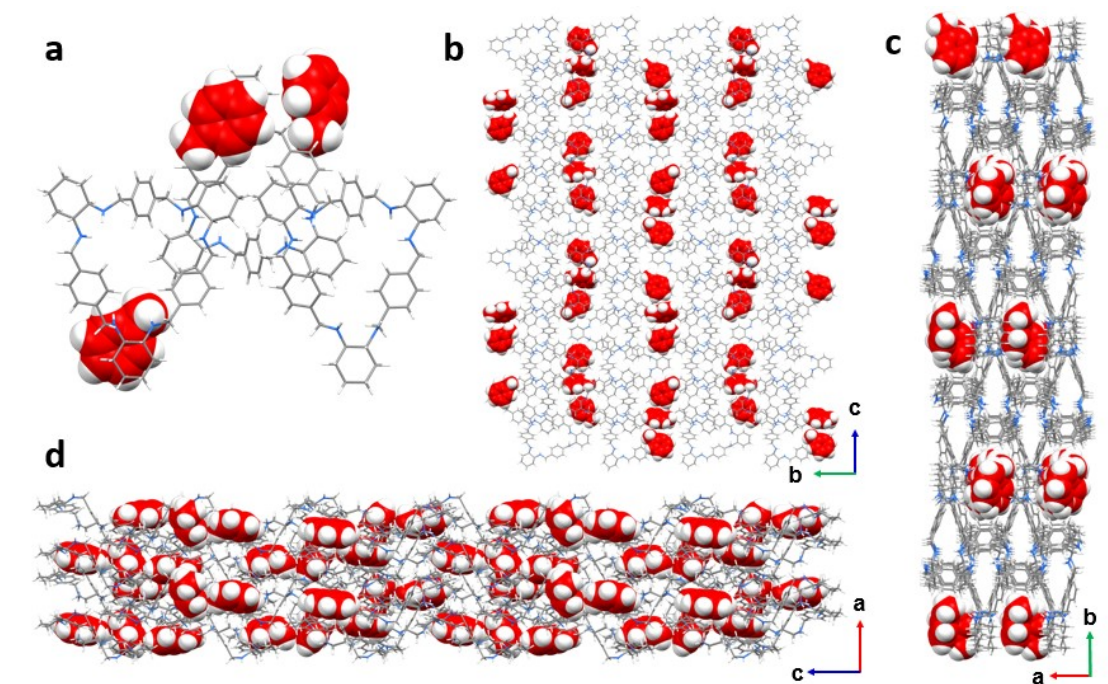

**Figure S22.** (a) Asymmetric unit of **Tol@TA**. (b-d) Packing arrangement of **Tol@TA** viewed from all crystallographic axes.

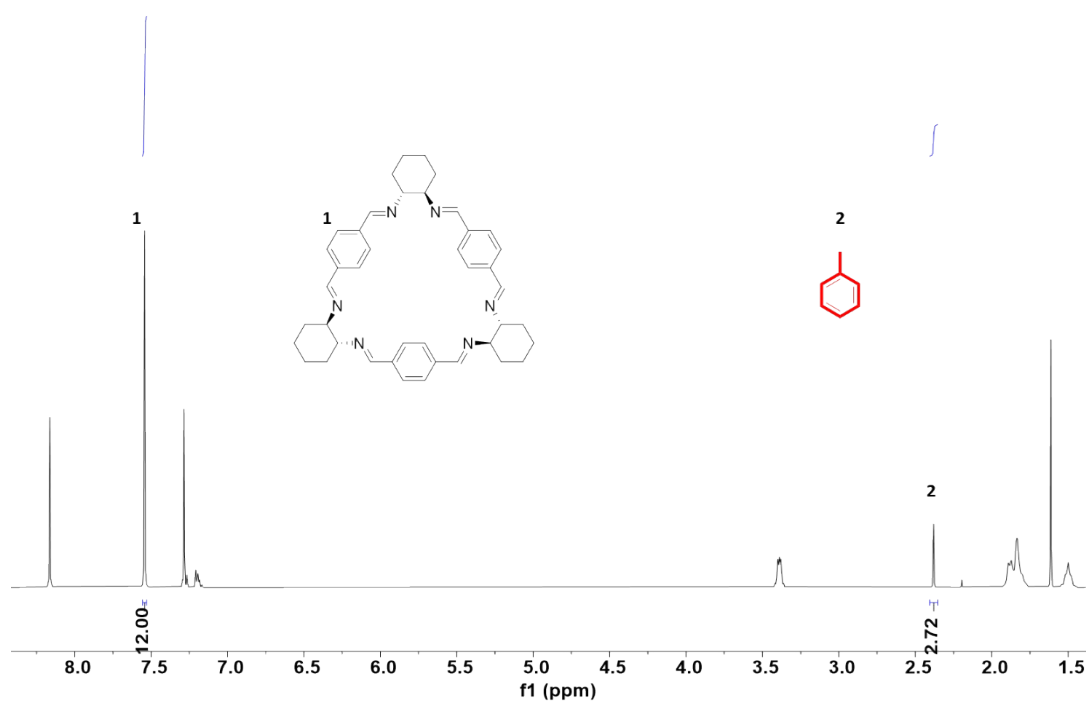

**Figure S23.**  $^1\text{H}$  NMR spectrum (500 MHz, chloroform-*d*, 298K) of activated **TI** after absorption of **Tol** vapor until saturation. The integrations can be calculated as about 1.0 equiv. of **Tol** per **TI** molecule.

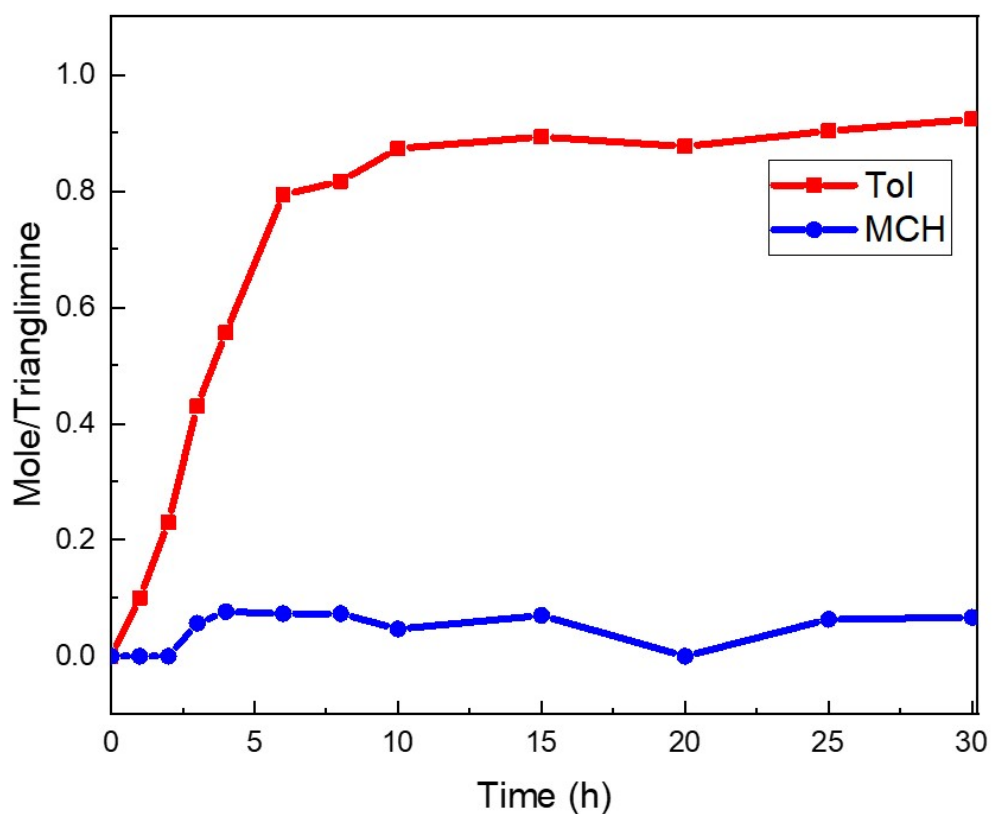

**Figure S24.** Time-dependent solid-vapor sorption curve of **TI** with single component of **Tol** and **MCH**.

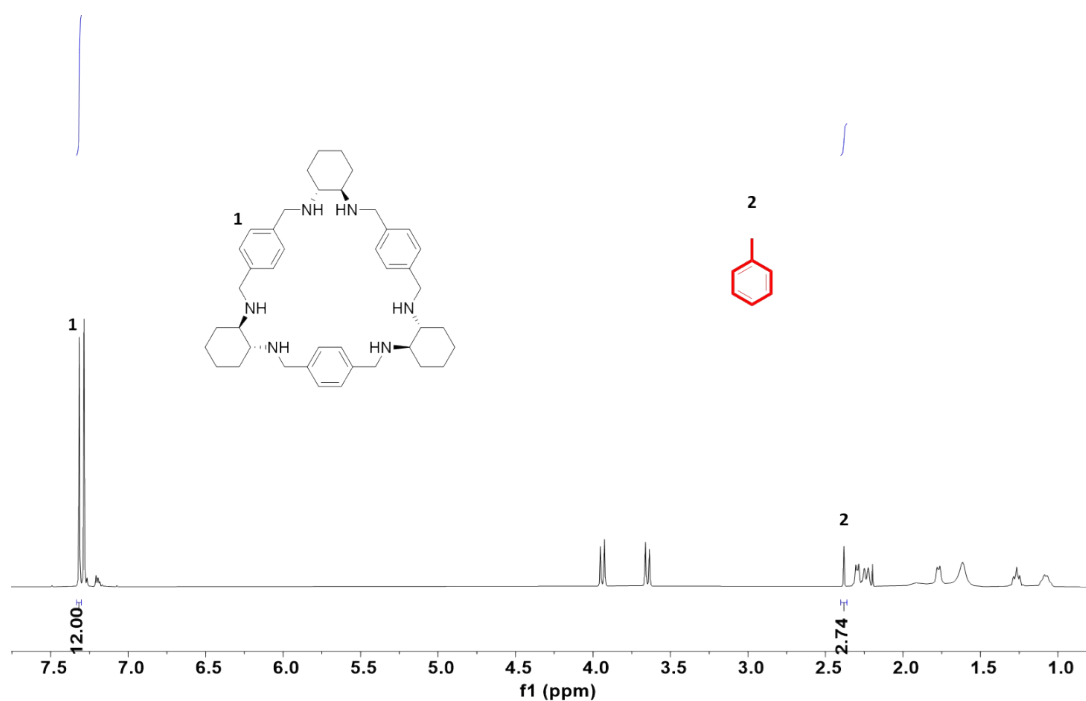

**Figure S25.** <sup>1</sup>H NMR spectrum (500 MHz, chloroform-*d*, 298K) of activated **TA** after absorption of **Tol** vapor until saturation. The integrations can be calculated as about 0.9 equiv. of **Tol** per **TA** molecule.

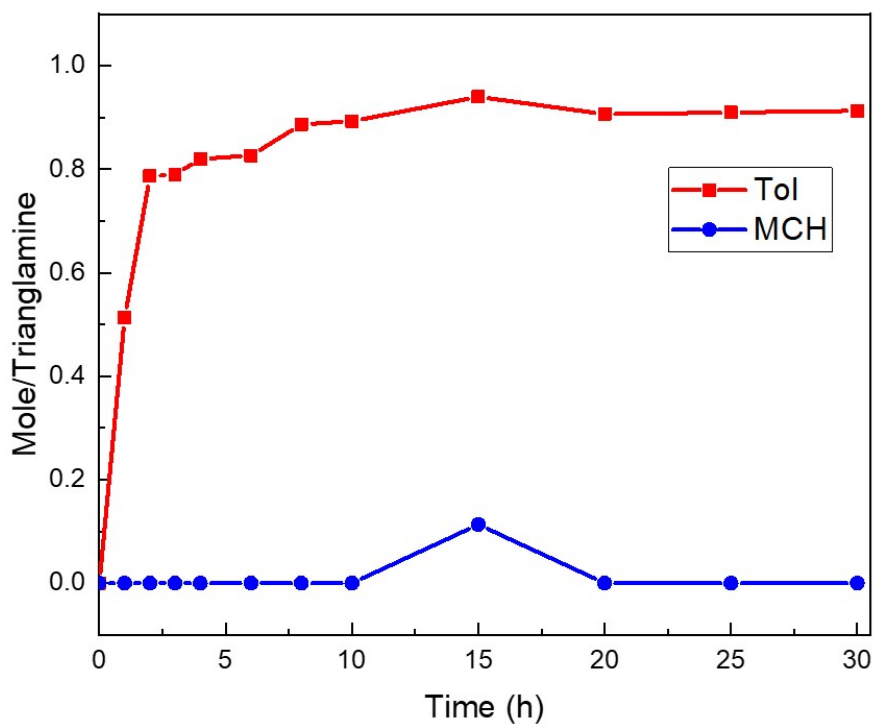

**Figure S26.** Time-dependent solid-vapor sorption curve of **TA** with single component of **Tol** and **MCH**.

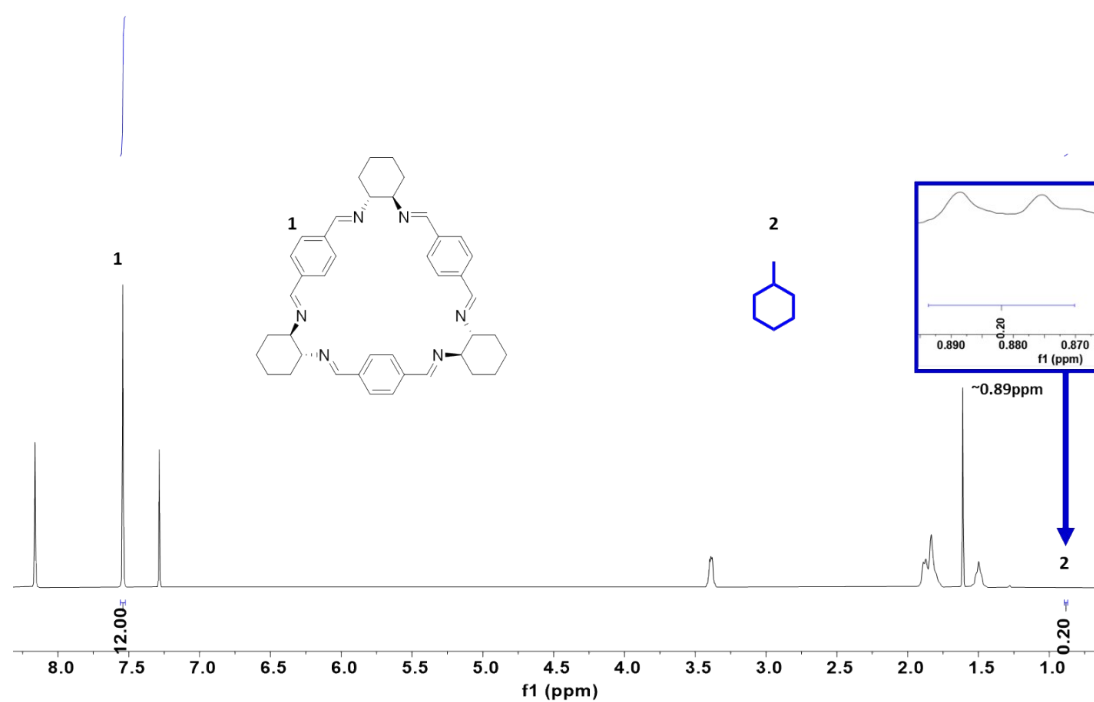

**Figure S27.** <sup>1</sup>H NMR spectrum (500 MHz, chloroform-*d*, 298K) of activated **TI** after absorption of **MCH** vapor until saturation. The integrations can be calculated as about 0.07 equiv. of **MCH** per **TI** molecule.

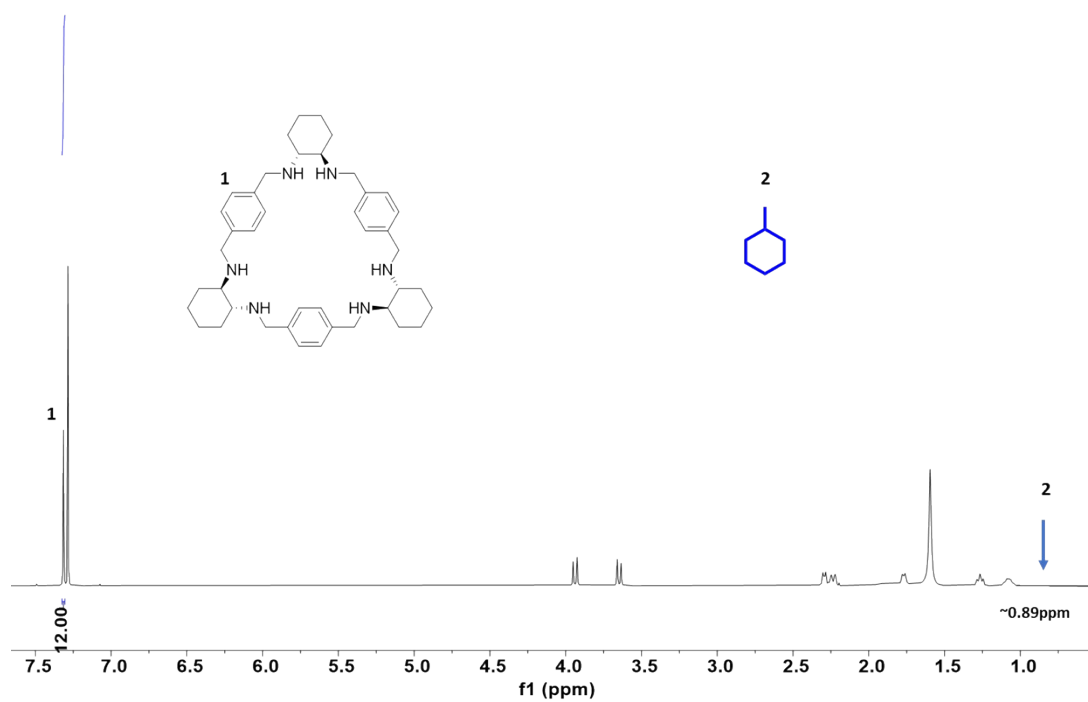

**Figure S28.**  $^1\text{H}$  NMR spectrum (500 MHz, chloroform-*d*, 298K) of activated TA after absorption of MCH vapor until saturation.

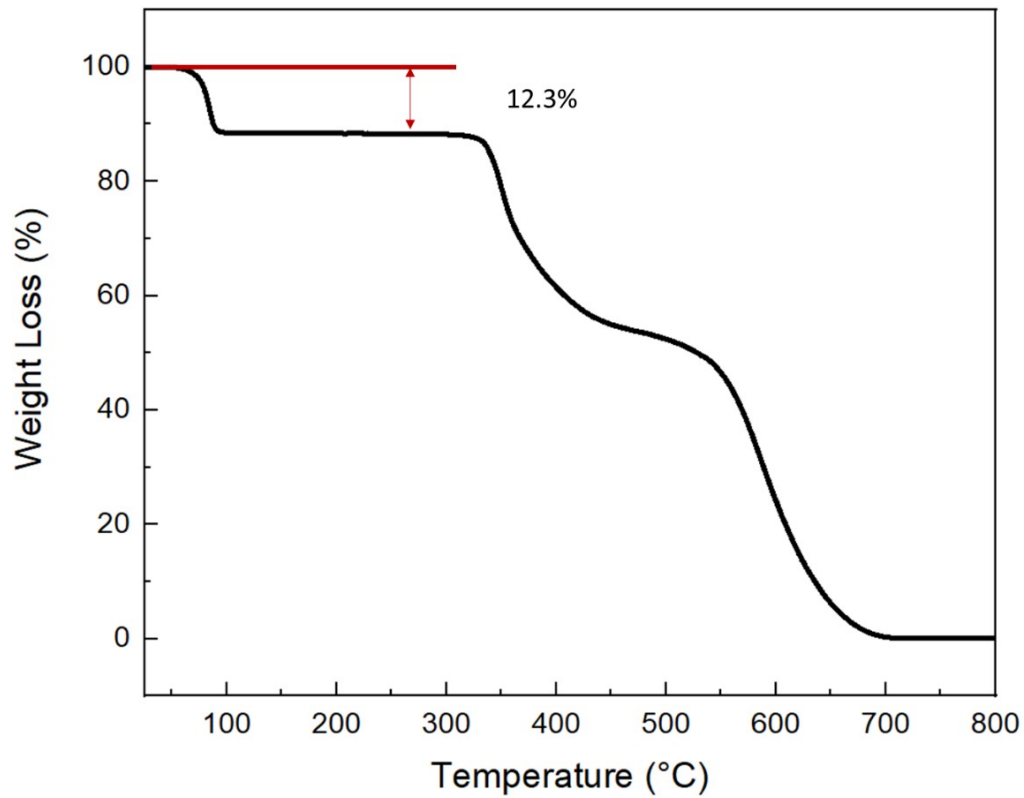

**Figure S29.** TGA curve of activated TI after absorption of Tol vapor until saturation.

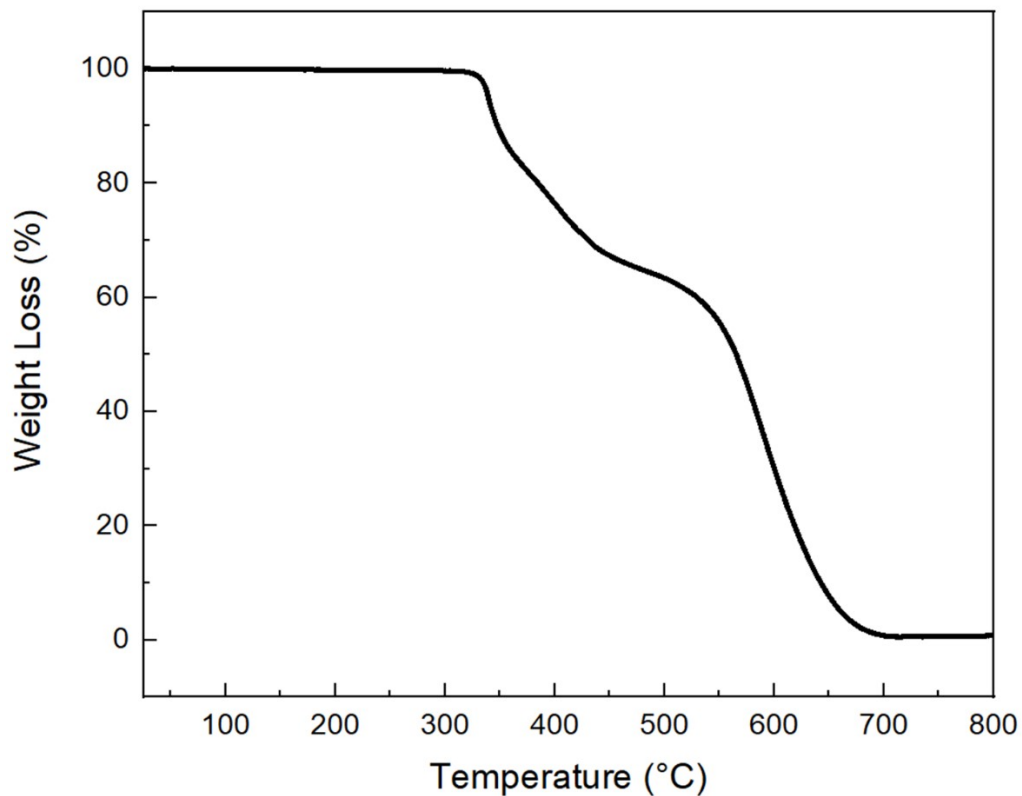

**Figure S30.** TGA curve of activated **TI** showing no absorption of **MCH** vapor upon exposure until saturation.

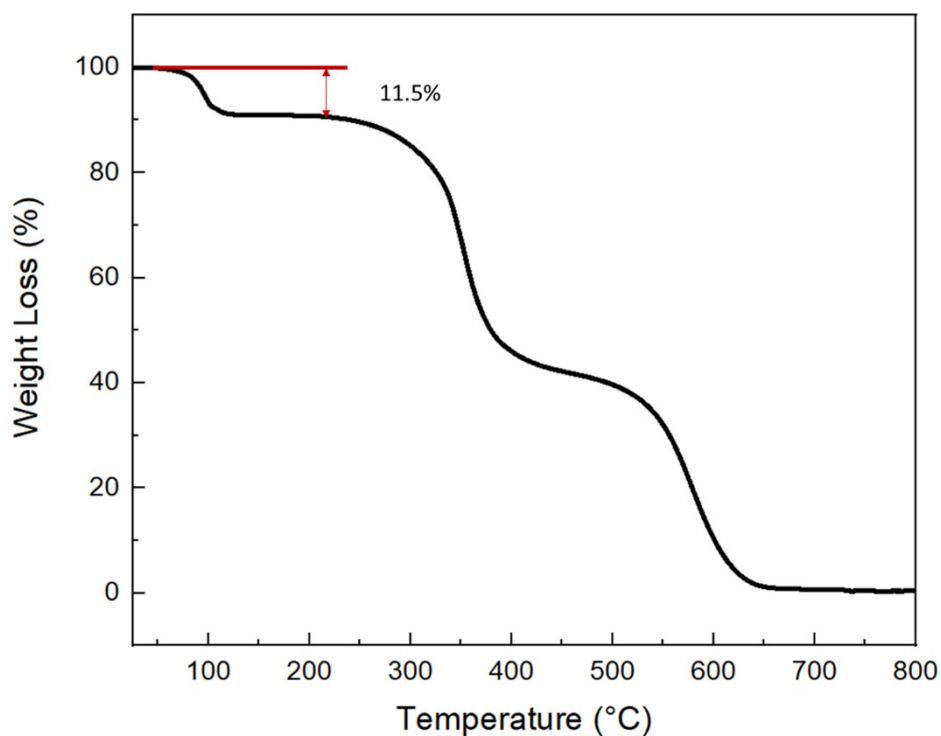

**Figure S31.** TGA curve of activated **TA** after absorption of **Tol** vapor until saturation.

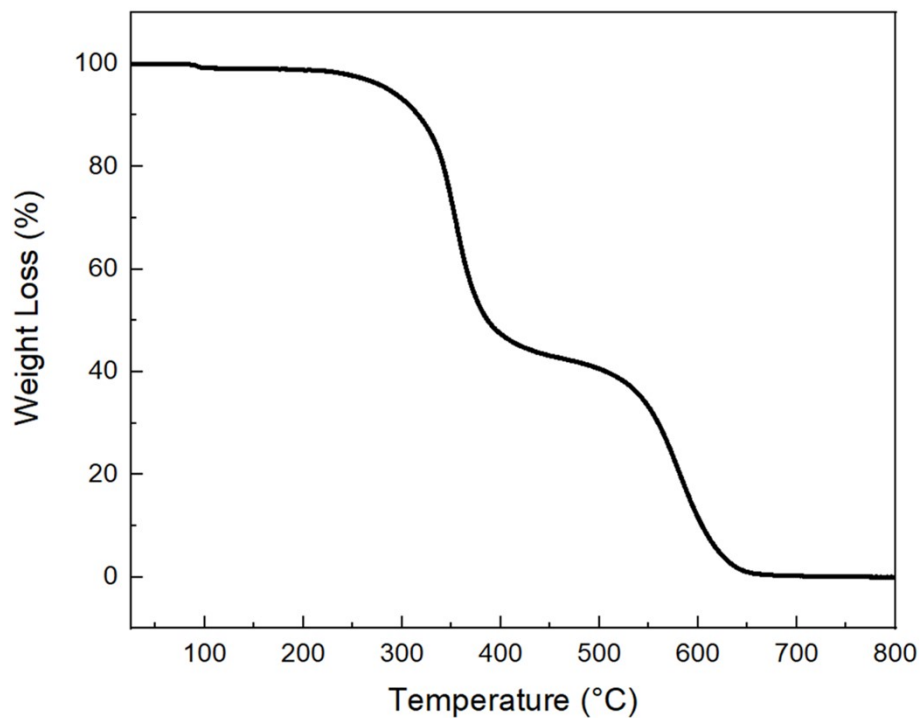

**Figure S32.** TGA curve of activated **TA** showing no absorption of **MCH** vapor upon exposure until saturation.

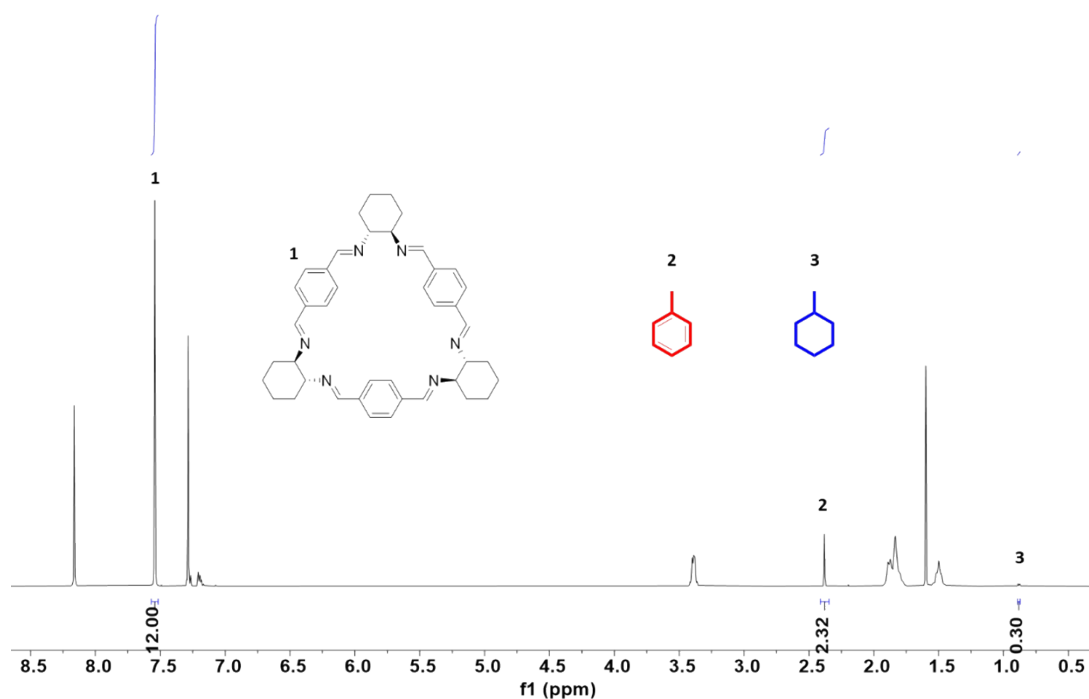

**Figure S33.** <sup>1</sup>H NMR spectrum (500 MHz, chloroform-*d*, 298K) of activated **TI** after exposure in the equal-volume **Tol/MCH** mixture until saturation.

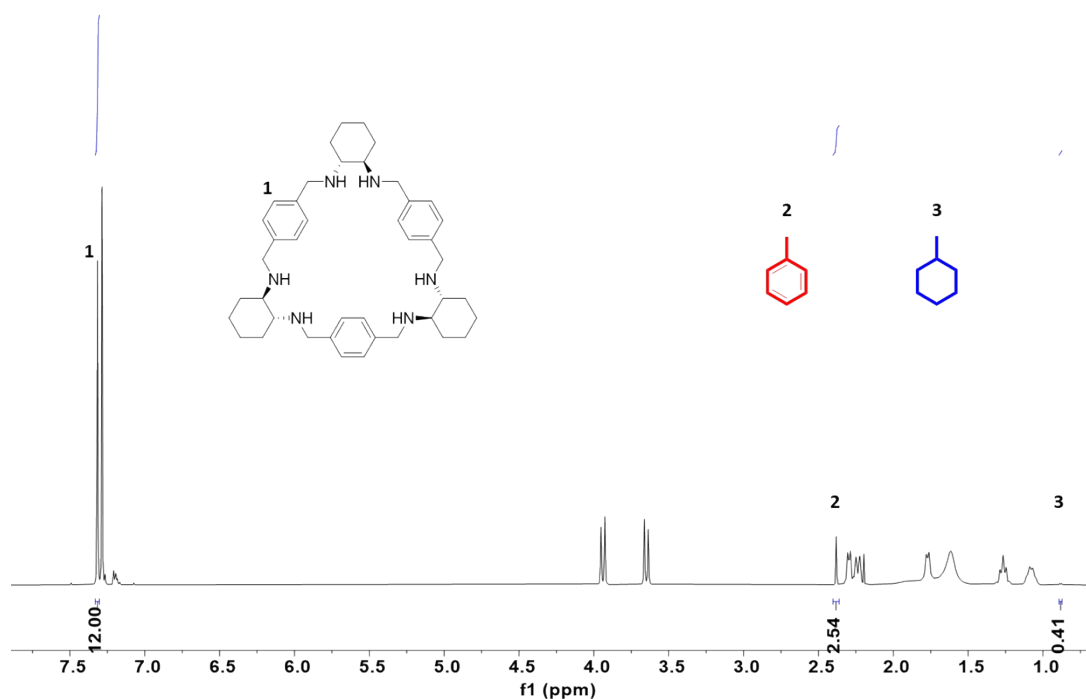

**Figure S34.**  $^1\text{H}$  NMR spectrum (500 MHz, chloroform- $d$ , 298K) of activated TA after exposure in the equal-volume **ToI/MCH** mixture until saturation.

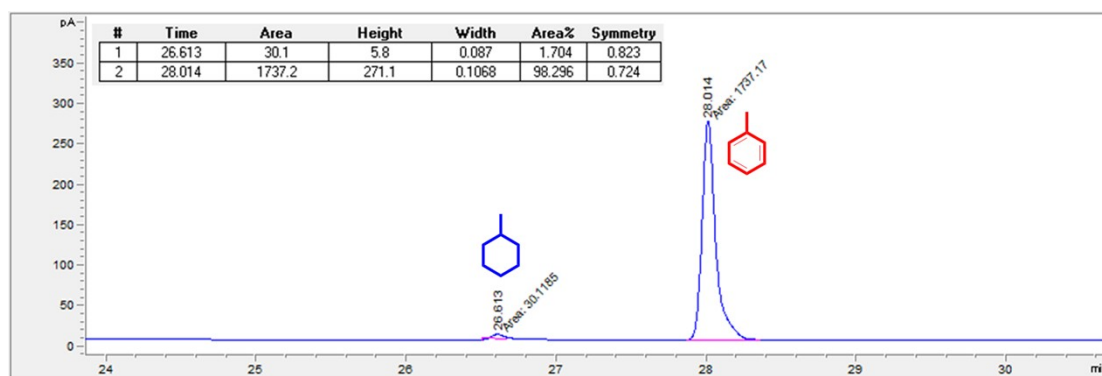

**Figure S35.** Relative uptakes of **ToI/MCH** adsorbed in **TI** after absorption of the equimolar mixture vapor until saturation using gas chromatography.

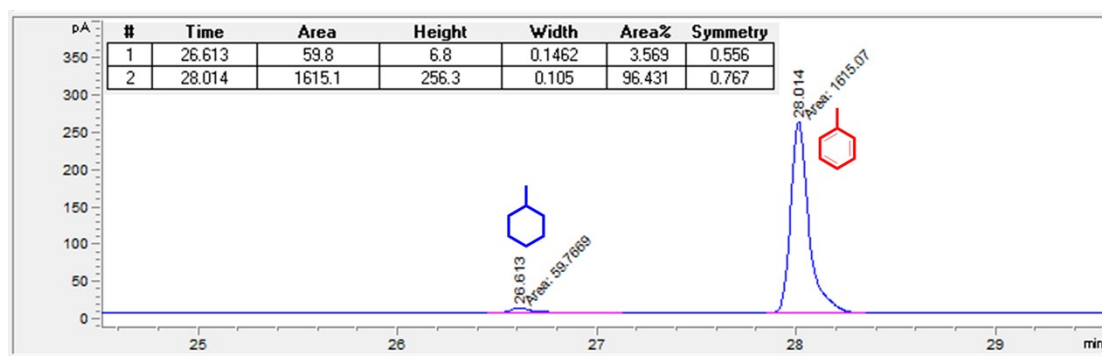

**Figure S36.** Relative uptakes of **ToI/MCH** adsorbed in **TA** after absorption of the equimolar

mixture vapor until saturation using gas chromatography.

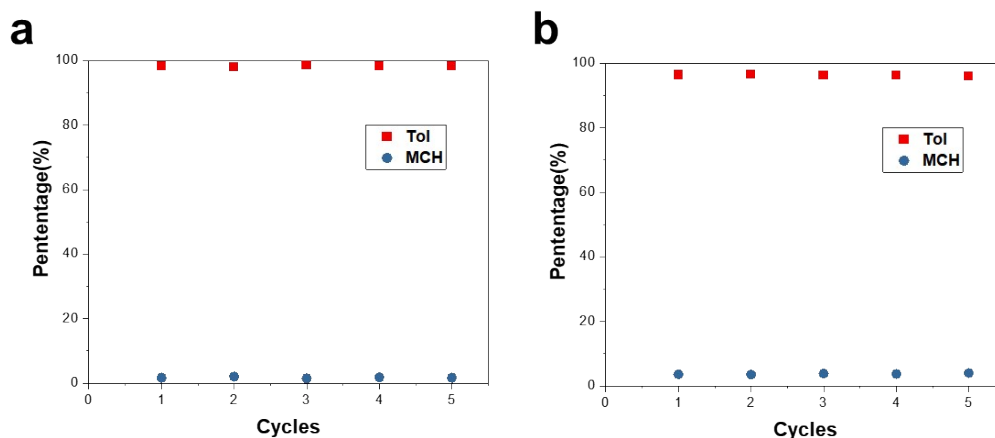

**Figure S37.** Relative uptakes of Tol/MCH adsorbed in (a) TI and (b) TA after absorption of the equimolar mixture vapor until saturation for five cycles.

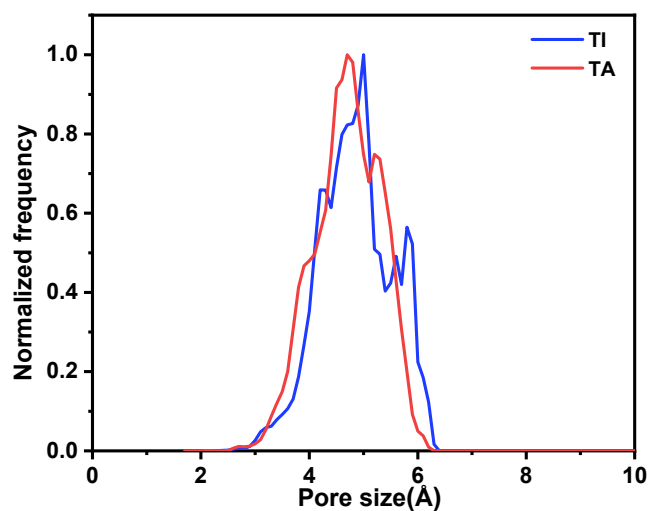

**Figure S38.** Simulated pore size distributions of the single crystal structures of Tol@TI and Tol@TA after removing Tol molecules.



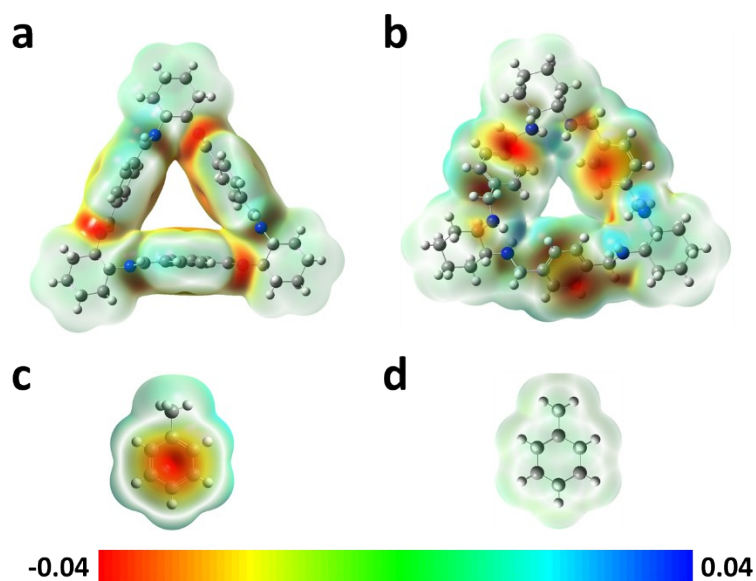

**Figure S39.** Electrostatic potentials (ESPs) mapped onto electron density isosurfaces of (a) **TI**, (b) **TA**, (c) **Tol**, and (d) **MCH**.

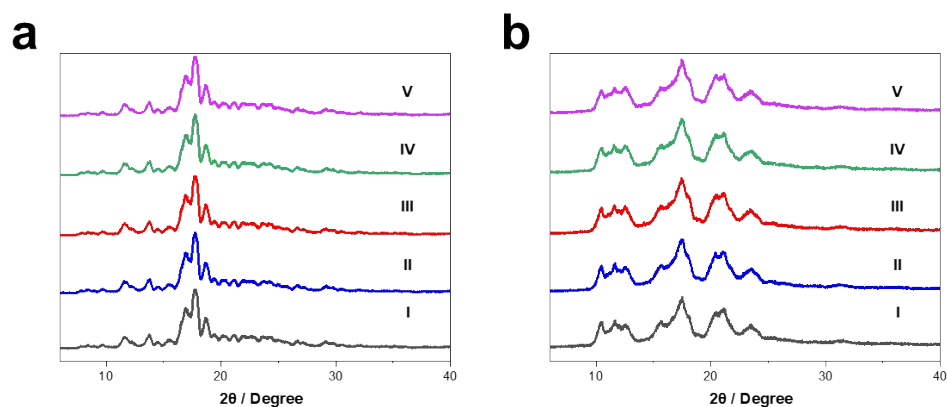

**Figure S40.** PXRD patterns showing the recyclability of (a) **TI** and (b) **TA** for the adsorption of mixed **Tol/MCH** after five cycles.

**Table S3.** Tol capacity of various adsorbents.

| Adsorbents          | Type             | Uptake of Toluene<br>298 K and 1.0 bar<br>(mg/g) | Method                  | Ref. |
|---------------------|------------------|--------------------------------------------------|-------------------------|------|
| SRC-3K-700          | Activated Carbon | 1587 mg/g                                        | Vapor sorption isotherm | S10  |
| Activated bone-char | Activated Carbon | 1198 mg/g                                        | Vapor sorption isotherm | S11  |
| LDAC                | Activated Carbon | 600 mg/g                                         | Vapor sorption isotherm | S12  |
| ZIF-67-PLs          | Mofs             | 138 mg/g                                         | Vapor sorption          | S13  |

|                          |                          |           |                         |           |
|--------------------------|--------------------------|-----------|-------------------------|-----------|
|                          |                          |           | isotherm                |           |
| Cu-Mof                   | Mofs                     | 200 mg/g  | Vapor sorption isotherm | S14       |
| MIL-101@GQD-3            | Mofs                     | 2680 mg/g | Vapor sorption isotherm | S15       |
| UiO-66(NH <sub>2</sub> ) | Mofs                     | 252 mg/g  | Vapor sorption isotherm | S16       |
| SMP                      | Porous polymer           | 300 mg/g  | Vapor sorption isotherm | S17       |
| PS-PMMA-rGO              | Porous polymer           | 250 mg/g  | Vapor sorption isotherm | S18       |
| M-1.3                    | Ordered porous silica    | 170 mg/g  | Vapor sorption isotherm | S19       |
| TAPM-1                   | Porous Organic Framework | 210 mg/g  | Vapor sorption isotherm | S20       |
| EtP5                     | NACS                     | 324 mg/g  | Vapor sorption isotherm | S21       |
| EtP6                     | NACS                     | 156 mg/g  | Vapor sorption isotherm | S21       |
| Thiacalixarene           | NACS                     | 84 mg/g   | Solid–vapor adsorption  | S22       |
| TI                       | NACS                     | 130 mg/g  | Solid–vapor adsorption  | This work |
| TA                       | NACS                     | 127 mg/g  | Solid–vapor adsorption  | This work |

References:

S1 M. Chadim, et al, *Tetrahedron: Asymmetry.*, **2001**, 12, 127–133.

S2 J. Gawronski, et al. *Chem. Eur. J.* **2006**, 12, 1807–1817.

S3 SAINT. Bruker AXS. Inc, Madison, Wisconsin, USA, 2014.

S4 SADABS. G. M. Sheldrick, University of Gottingen, Germany, 2008.

S5 G. M. Sheldrick, *Acta Crystallogr.*, **2008**, A64, 112-122.

S6 L. J. Barbour, *Supramol. Chem.*, **2001**, 1, 189-191.

S7 M. L. Connolly, *Science*, **1983**, 221, 709-713.

- S8 M. L. Connolly, *J. Mol. Graphics*, **1993**, *11*, 139.
- S9 T.F. Willems, et al. *Microporous Mesoporous Mater.*, **2012**, *149*, 134-141.
- S10 D. Li, J. Yang, Y. Zhao, H. Yuan, Y. Chen. *J. Clean. Prod.*, **2022**, *337*, 130283.
- S11 Y. Yang, C. Sun, B. Lin, Q. Huang. *Chemosphere*, **2020**, *256*, 127054.
- S12 D. Saha, N. Mirando, A. Levchenko. *J. Clean. Prod.*, **2018**, *182*, 372.
- S13 X. Li, et al. *J. Chem. Eng.*, **2021**, *417*, 129239.
- S14 G. Li, et al. *Sep. Purif. Technol.*, **2021**, *256*, 117781.
- S15 M. S. Alivand, *J. Hazard. Mater.*, **2021**, *416*, 125973.
- S16 K. Vellingiri, et al. *J. Chem. Eng.*, **2017**, *307*, 1116.
- S17 Q. Pujol, et al. *Microporous Mesoporous Mater.*, **2022**, *344*, 112204.
- S18 M. R. Krishnan, et al. *Environ. Nanotechnol. Monit. Manag.*, **2023**, *20*, 100860.
- S19 S. Hou, et al. *J. Chem. Eng.*, **2022**, *435*, 134844.
- S20 C. Chen, et al. *Angew. Chem. Int. Ed.*, **2022**, *61*, e2022016.
- S21 K. Jie, et al. *Angew. Chem. Int. Ed.*, **2018**, *57*, 12845.
- S22 M. Yamada, et al. *Chem. Commun.*, **2023**, *59*, 2604.
